# Supplementary material for: An automated catalytic spectrophotometric method for manganese analysis using a chip-multisyringe flow injection system (Chip-MSFIA)
Source: Royal Society of Chemistry journal article supplement (doi:10.1039/c4ay00624k), 2014-01-01
Supplement: c4ay00624k1.pdf [file c4ay00624k1.pdf]

## Automated catalytic spectrophotometric method for manganese analysis using a chip-multisyringe flow injection system (Chip-MSFIA)

Piyawan Phansi<sup>a, b</sup>, Camelia Henríquez<sup>c</sup>, Edwin Palacio<sup>c</sup>, Prapin Wilairat<sup>a,b</sup>, Duangjai Nacapricha<sup>a,b</sup>, Víctor Cerdà<sup>c</sup>

### Appendices. Supporting information

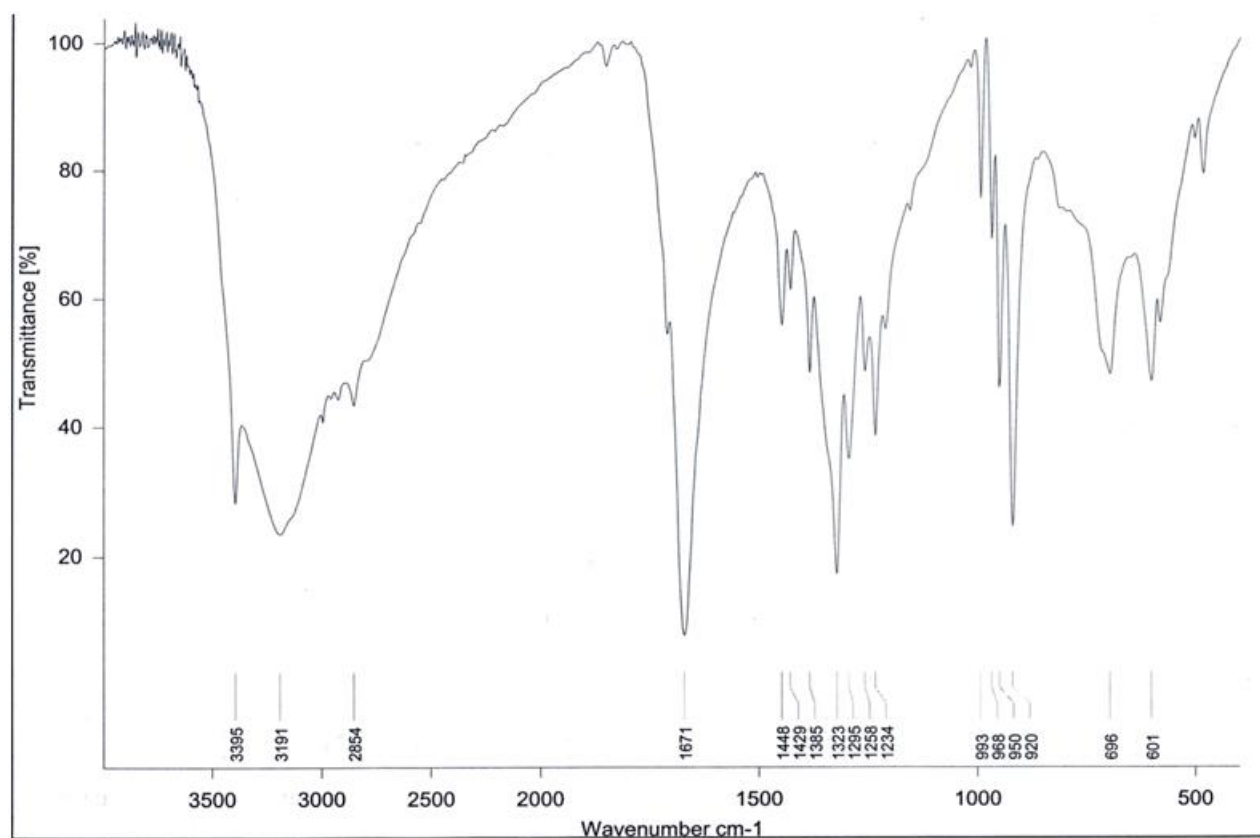

Fig. A-1. IR spectrum of succinimidedioxime (SIDO).

Probe: 5 mm TBI 1H/13C/D-BB Z-GRD Z8618/0027 Sample depth:20 Gas: nitrogen  
Sample: succinimidodioxima in H2O:D2O(5%) (T=298K)  
experiment: zggpw5 <sup>1</sup>H (1.013)  
Experiment fet: 23/05/13

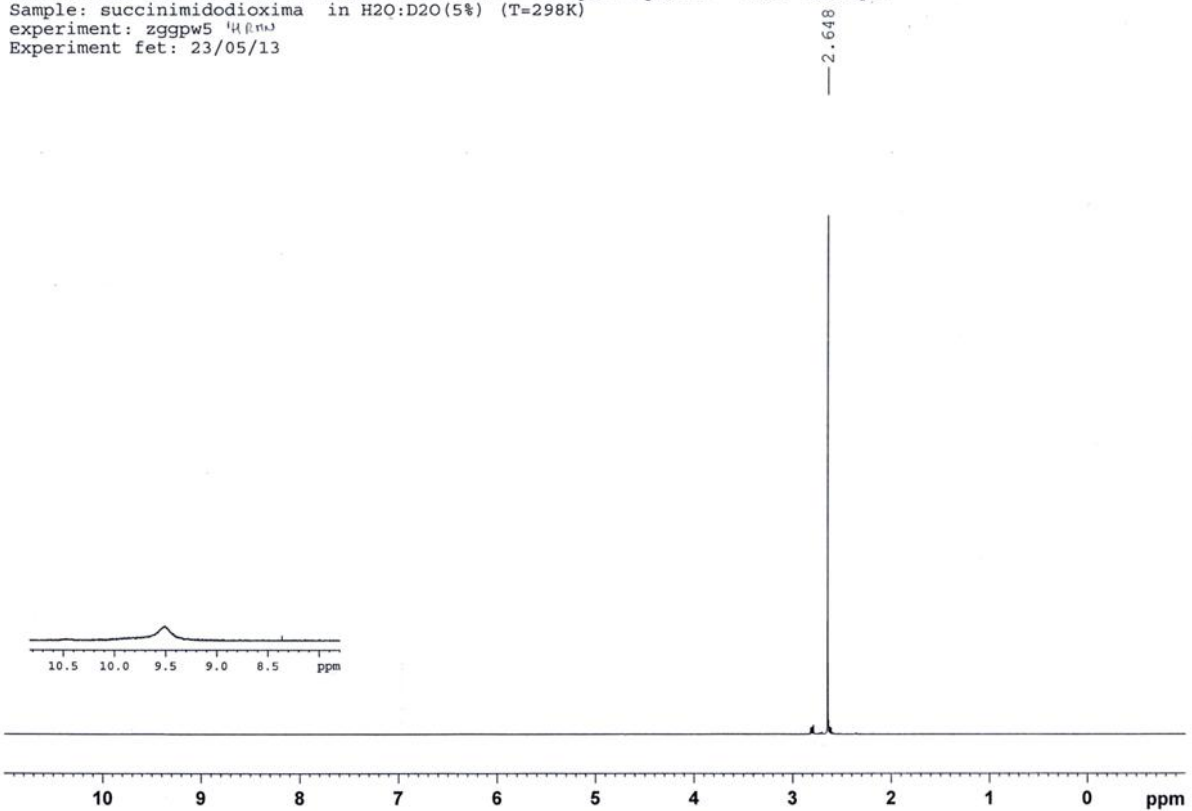

Fig. A-2. <sup>1</sup>H-NMR spectrum of succinimidodioxime (SIDO).

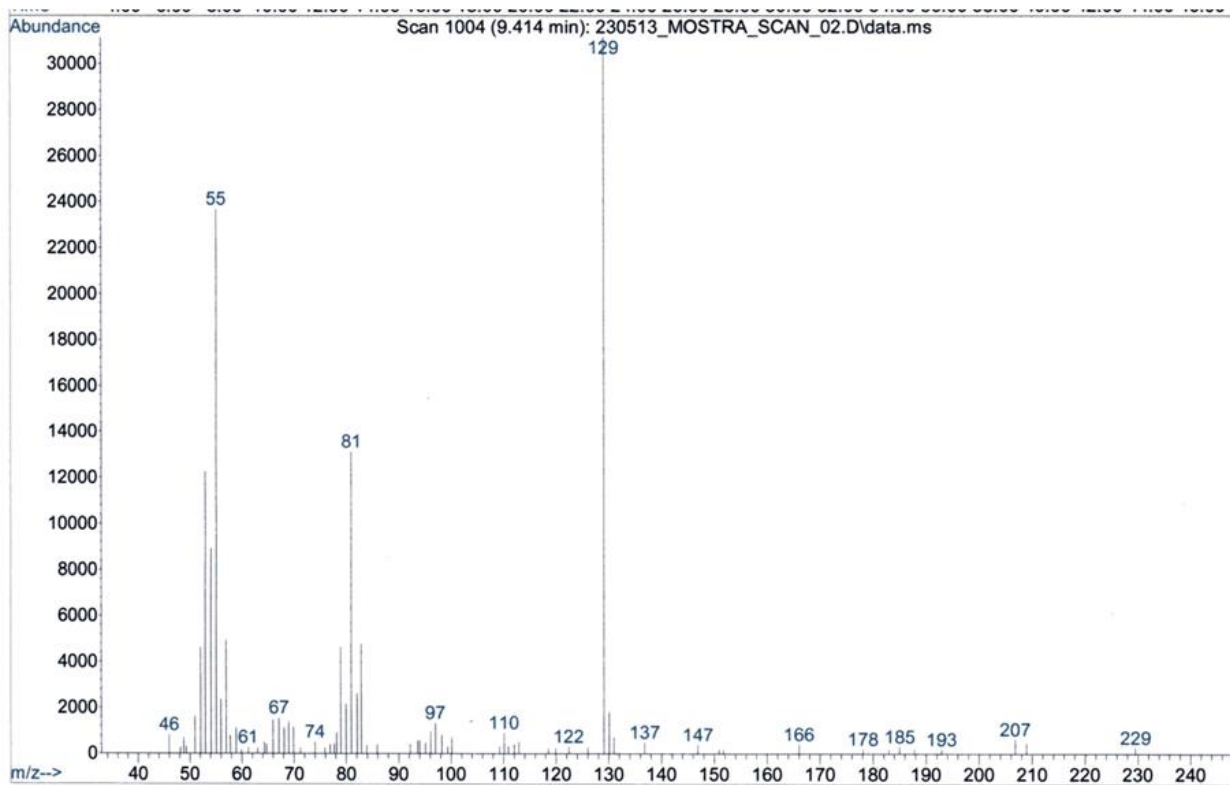

**Fig. A-3.** GC-MS spectrum of succinimidedioxime (SIDO).

**Table A-1.** Results of multivariate analysis. Screening ( $2^3$ ) full factorial design observe std/blank ratio

| Factor and interaction         | Fixed time method |                      |         | Factor and interaction      | Initial rate method |                      |         |
|--------------------------------|-------------------|----------------------|---------|-----------------------------|---------------------|----------------------|---------|
|                                | Exp Domain        | Pareto's coefficient | p-value |                             | Exp Domain          | Pareto's coefficient | p-value |
| Temp ( $^{\circ}\text{C}$ )    | 27-35             | 15.28                | 0.0043  | Temp ( $^{\circ}\text{C}$ ) | 27-35               | 82.52                | 0.0001  |
| SIDO ( $\text{m mol L}^{-1}$ ) | 2.8-4.8           | -0.75                | 0.5337  | SIDO ( $\text{mM}$ )        | 2.8-4.8             | -0.49                | 0.6719  |
| NaOH ( $\text{mol L}^{-1}$ )   | 0.2-0.6           | -3.91                | 0.0595  | NaOH ( $\text{M}$ )         | 0.2-0.6             | 50.06                | 0.0004  |
| Temp vs NaOH                   |                   | -11.71               | 0.0072  | Temp vs NaOH                |                     | 34.13                | 0.0009  |
| Temp vs SIDO vs NaOH           |                   | -7.13                | 0.0191  | Temp vs SIDO vs NaOH        |                     | 16.11                | 0.0038  |
| SIDO vs NaOH                   |                   | 4.25                 | 0.0511  | SIDO vs NaOH                |                     | -13.38               | 0.0055  |
| Temp vs SIDO                   |                   | 1.38                 | 0.3015  | Temp vs SIDO                |                     | 13.08                | 0.0058  |

*Fixed time method:* The std/blank results fitted well with 3-way interaction, without a significant lack of fit ( $r^2 = 0.99574$ , adj. 0.9787), and a pure error of 0.000122.

*Initial rate method:* The std/blank results fitted well with 3-way interaction, without a significant lack of fit ( $r^2 = 0.99983$ , adj. 0.99915), and a pure error of 0.0000345.

**Table A-2.** Results of multivariate analysis. Screening ( $2^3$ ) full factorial design observe slope [(slope of std  $5 \mu\text{g L}^{-1} \text{Mn(II)}$  – slope of blank)/5].

| Factor and interaction         | Fixed time method |                      |         | Factor and interaction      | Initial rate method |                      |         |
|--------------------------------|-------------------|----------------------|---------|-----------------------------|---------------------|----------------------|---------|
|                                | Exp Domain        | Pareto's coefficient | p-value |                             | Exp Domain          | Pareto's coefficient | p-value |
| Temp ( $^{\circ}\text{C}$ )    | 27-35             | 33.84                | 0.0009  | Temp ( $^{\circ}\text{C}$ ) | 27-35               | 77.91                | 0.0002  |
| SIDO ( $\text{m mol L}^{-1}$ ) | 2.8-4.8           | 16.79                | 0.0035  | SIDO ( $\text{mM}$ )        | 2.8-4.8             | 10.23                | 0.0094  |
| NaOH ( $\text{mol L}^{-1}$ )   | 0.2-0.6           | 58.04                | 0.0003  | NaOH ( $\text{M}$ )         | 0.2-0.6             | 72.92                | 0.0002  |
| Temp vs NaOH                   |                   | 4.86                 | 0.0397  | Temp vs NaOH                |                     | 46.43                | 0.0005  |
| Temp vs SIDO vs NaOH           |                   | -3.74                | 0.0647  | Temp vs SIDO vs NaOH        |                     | 22.71                | 0.0019  |
| SIDO vs NaOH                   |                   | 8.72                 | 0.0128  | SIDO vs NaOH                |                     | -2.48                | 0.1307  |
| Temp vs SIDO                   |                   | 3.81                 | 0.0624  | Temp vs SIDO                |                     | 20.01                | 0.0025  |

*Fixed time method:* The slope results fitted well with 3-way interaction, without a significant lack of fit ( $r^2 = 0.99959$ , adj. 0.99797), and a very low pure error.

*Initial rate method:* The slope results fitted well with 3-way interaction, without a significant lack of fit ( $r^2 = 0.99987$ , adj. 0.99933), and a very low pure error.

**Table A-3.** Results of multivariate analysis. Screening ( $3^2$ ) full factorial design observe std/blank ratio

| Factor and interaction             | Fixed time method |                          |         | Factor and interaction | Initial rate method |                           |          |
|------------------------------------|-------------------|--------------------------|---------|------------------------|---------------------|---------------------------|----------|
|                                    | Exp Domain        | Pareto's coefficient     | p-value |                        | Exp Domain          | Pareto's coefficient      | p-value  |
| SIDO (L+Q) (mmol L <sup>-1</sup> ) | 4.1 – 5.5         | (L) -18.55               | 0.0001  | SIDO (L+Q) (mM)        | 4.1 – 5.5           | (L) 30.98                 | 0.000045 |
| NaOH (L+Q) (mol L <sup>-1</sup> )  | 0.4 – 0.8         | (Q) -38.89<br>(L) -31.63 | 0.0002  | NaOH (L+Q) (M)         | 0.4 – 0.8           | (Q) -37.45<br>(L) -117.68 | 0.000001 |
| SIDO (Q) vs NaOH (Q)               |                   | (Q) 36.95<br>40.60       |         | SIDO (Q) vs NaOH (Q)   |                     | (Q) 160.16<br>70.56       |          |
| SIDO (Q) vs NaOH (L)               |                   | -24.97                   |         | SIDO (Q) vs NaOH (L)   |                     | -70.05                    |          |
| SIDO (L) vs NaOH (L)               |                   | 4.63                     |         | SIDO (L) vs NaOH (L)   |                     | -23.93                    |          |
|                                    |                   |                          |         | SIDO (L) vs NaOH (Q)   |                     | -20.19                    |          |

*Fixed time method:* The std/blank results fitted well with 2-way interaction, without a significant lack of fit ( $r^2 = 0.99949$ , adj. 0.99814), and a pure error of 0.0000052.

*Initial rate method:* The std/blank results fitted well with 2-way interaction (linear, quadr), without a significant lack of fit ( $r^2 = 0.99995$ , adj. 0.99983), and a pure error of 0.000004.

**Table A-4.** Results of multivariate analysis. Screening ( $3^2$ ) full factorial design observe slope [(slope of std 5  $\mu\text{g L}^{-1}$  Mn(II) – slope of blank)/5].

| Factor and interaction             | Fixed time method |                       |         | Factor and interaction | Initial rate method |                          |          |
|------------------------------------|-------------------|-----------------------|---------|------------------------|---------------------|--------------------------|----------|
|                                    | Exp Domain        | Pareto's coefficient  | p-value |                        | Exp Domain          | Pareto's coefficient     | p-value  |
| SIDO (L+Q) (mmol L <sup>-1</sup> ) | 4.1 – 5.5         | (L) -                 | 0.0094  | SIDO (L+Q) (mM)        | 4.1 – 5.5           | (L) 49.95                | 0.000038 |
| NaOH (L+Q) (mol L <sup>-1</sup> )  | 0.4 – 0.8         | (Q) -7.60<br>(L) 7.79 | 0.0001  | NaOH (L+Q) (M)         | 0.4 – 0.8           | (Q) -13.12<br>(L) -15.65 | 0.000007 |
| SIDO (Q) vs NaOH (Q)               |                   | (Q) 12.53<br>11.05    |         | SIDO (Q) vs NaOH (Q)   |                     | (Q) 59.91<br>13.65       |          |
| SIDO (Q) vs NaOH (L)               |                   | -7.42                 |         | SIDO (Q) vs NaOH (L)   |                     | -7.56                    |          |
|                                    |                   |                       |         | SIDO (L) vs NaOH (L)   |                     | -21.63                   |          |
|                                    |                   |                       |         | SIDO (L) vs NaOH (Q)   |                     | 12.49                    |          |

*Fixed time method:* The slope results fitted well with 2-way interaction (linear, quadr), without a significant lack of fit ( $r^2 = 0.99825$ , adj. 0.99358), and a very low pure error.

*Initial rate method:* The slope results fitted well with 2-way interaction (linear, quadr), without a significant lack of fit ( $r^2 = 0.99977$ , adj. 0.99917), and a very low pure error.
